# Supplementary material for: Combining metabolomics and transcriptomics to characterize tanshinone biosynthesis in Salvia miltiorrhiza
Source: PubMed Central journal article supplement (PMC3913955; doi:10.1186/1471-2164-15-73), 2014-01-28

Figure S2

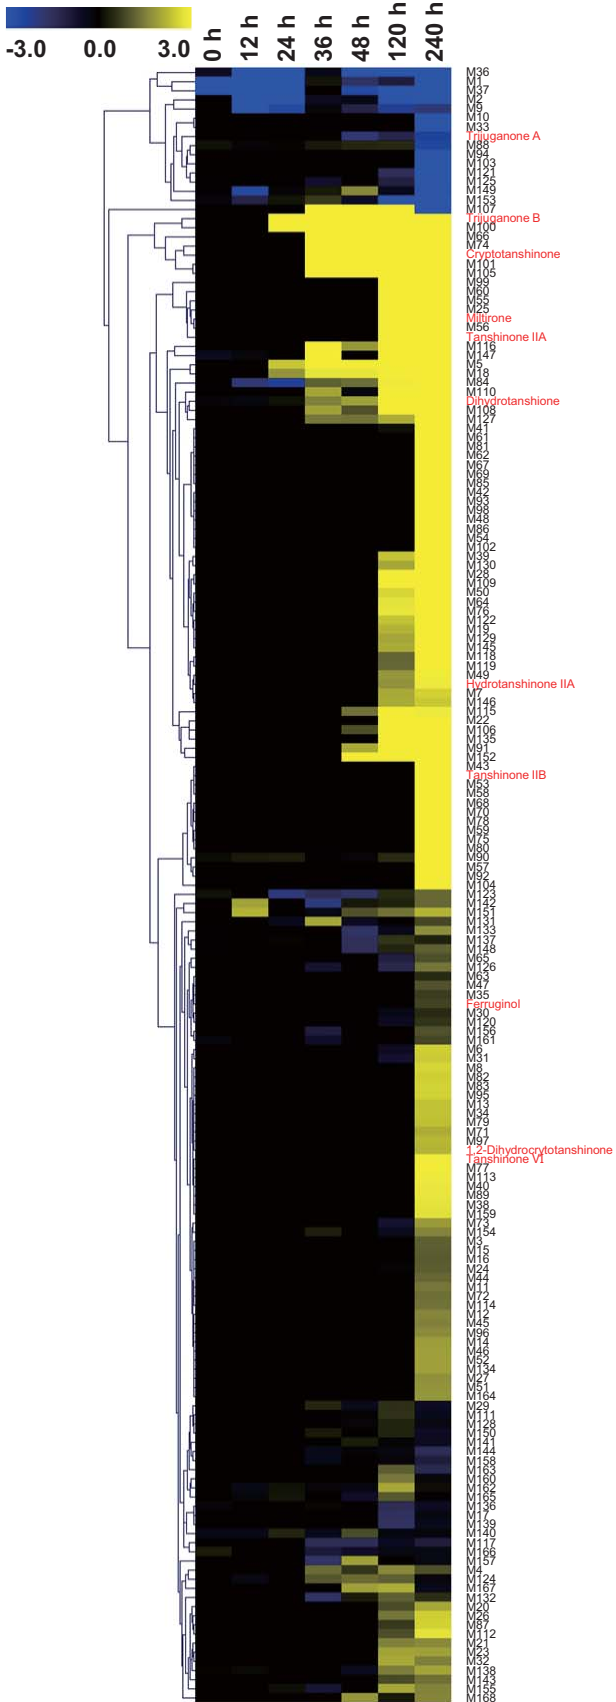

Supplement: 1471-2164-15-73-S2.pdf [file 1471-2164-15-73-S2.pdf]
