# Supplementary material for: Combining metabolomics and transcriptomics to characterize tanshinone biosynthesis in Salvia miltiorrhiza
Source: PubMed Central journal article supplement (PMC3913955; doi:10.1186/1471-2164-15-73), 2014-01-28
Supplement: 1471-2164-15-73-S6.pdf [file 1471-2164-15-73-S6.pdf]

**Table S4: Summary of sequence reads with matches on *S. miltiorrhiza* isotigs.**

| <b>Sample</b> | <b>Mapped reads</b> | <b>Total reads</b> |
|---------------|---------------------|--------------------|
| 0 h           | 5,013,001 (72.84%)  | 6,882,388          |
| 12 h          | 4,621,801 (73.36%)  | 6,300,372          |
| 24 h          | 4,321,814 (75.40%)  | 5,731,519          |
| 36 h          | 4,140,869 (72.77%)  | 5,690,024          |
