# Supplementary material for: Combining metabolomics and transcriptomics to characterize tanshinone biosynthesis in Salvia miltiorrhiza
Source: PubMed Central journal article supplement (PMC3913955; doi:10.1186/1471-2164-15-73), 2014-01-28
Supplement: 1471-2164-15-73-S7.pdf [file 1471-2164-15-73-S7.pdf]

**Table S5: Summary of *S. miltiorrhiza* isotigs with matched sequence reads.**

| <b>Sample</b>         | <b>Total isotigs</b> | <b>Mapped isotigs</b> |
|-----------------------|----------------------|-----------------------|
| 0 h                   |                      | 20,553 (79.68%)       |
| 12 h                  |                      | 20,195 (78.30%)       |
| 24 h                  | 25,793               | 20,305 (78.72%)       |
| 36 h                  |                      | 20,367 (78.96%)       |
| Total mapped<br>cDNAs |                      | 22,464 (87.09%)       |
