# Supplementary material for: Combining metabolomics and transcriptomics to characterize tanshinone biosynthesis in Salvia miltiorrhiza
Source: PubMed Central journal article supplement (PMC3913955; doi:10.1186/1471-2164-15-73), 2014-01-28
Supplement: 1471-2164-15-73-S10.pdf [file 1471-2164-15-73-S10.pdf]

**Table S7: List of up- and down-regulated DE genes at different time points post-induction.**

| <b>Sample</b> | <b>Up-regulated genes</b> | <b>Down-regulated genes</b> | <b>Total changed genes</b> |
|---------------|---------------------------|-----------------------------|----------------------------|
| 12 h          | 1,537                     | 3,619                       | 5,156                      |
| 24 h          | 1,240                     | 2,418                       | 3,658                      |
| 36 h          | 904                       | 1,645                       | 2,549                      |
