# Supplementary material for: Combining metabolomics and transcriptomics to characterize tanshinone biosynthesis in Salvia miltiorrhiza
Source: PubMed Central journal article supplement (PMC3913955; doi:10.1186/1471-2164-15-73), 2014-01-28
Supplement: 1471-2164-15-73-S16.pdf [file 1471-2164-15-73-S16.pdf]

**Table S11: Primers used for qRT-PCR analysis of selected tanshinone biosynthesis related genes.**

| <b>Gene Name</b> | <b>Primer sequence (5'-3')</b>                                           |
|------------------|--------------------------------------------------------------------------|
| SmAACT           | SmAACT-1: ATGCTGAAGGACGGACTCTGGGATG<br>SmAACT-2: TTGTCAACAATGGTGGATGG    |
| SmHMGS           | SmHMGS-1: GATGCCGACTACTTTGTATTTCT<br>SmHMGS-2: CTCGACTTCAACTTCTCTGAA     |
| SmHMGR           | SmHMGR-1: GCAACATCGTCTCCGCCGTCTACA<br>SmHMGR-2: GATGGTGGCCAGCAGCCTGGAGTT |
| SmDXR            | SmDXR-1: GAGAATCTACTGCTCCGAGA<br>SmDXR-2: CTGGTCGTAGTGGATGATCT           |
| SmFPPS           | SmFPPS-1: TTTTACCTCCCAGTTGCTTGTTG<br>SmFPPS-2: TTTACAACCAGCCAAGAACATT    |
| SmKSL            | SmKSL-1: CTTCCCAAGACAATGCAAAGAT<br>SmKSL-2: ATTTCCCTCTCACATTATTAGC       |
| SmCPS            | SmCPS-1: GATCGGAAGACGCTGTA<br>SmCPS-2: TCGCCAAGAAATAGGAAA                |
| SmERF13          | SmERF13-1: GAAATTCGCGGCGGAGATACGG<br>SmERF13-2: TCGCTTACTCACCTCGTCCGGCT  |
| Actin            | Actin-1: AGGAACCACCGATCCAGACA<br>Actin-2: GGTGCCCTGAGGTCCTGTT            |
